# Supplementary material for: Vehicle Maintenance Contracting in Developing Economies: The Role of Social Enterprise
Source: Atypon-hosted journal article supplement (doi:10.1287/msom.2020.0901), 2020-10-15
Supplement: msom.2020.0901.sm1.pdf [file msom.2020.0901.sm1.pdf]

# Vehicle Maintenance Contracting in Developing Economies: The Role of Social Enterprise

## Online Appendix: Proofs and Auxiliary Results

**Lemma A1** *The function*

$$S(t) \equiv h(t)M(t) - (1/p)F(t), \quad (\text{A1})$$

*has the following properties:  $S'(t) = h'(t)M(t) > 0$  with  $S(0) = 0$  and  $S(\infty) = \infty$ . Consequently,  $S(t) \geq 0$ . Moreover,  $\frac{\partial S(t)}{\partial p} < 0$  for any  $t > 0$ .*

**Proof** Recall  $H(t) = \int_0^t h(z)dz$  and  $\bar{F}(t) = \exp(-pH(t))$  and the assumptions  $h(0) = 0$ ,  $h(\infty) = \infty$ , and  $h'(t) > 0$ . Clearly,  $S(0) = 0$  and  $S(\infty) = \infty$ . Using the identity  $\bar{F}'(t) = -ph(t)\bar{F}(t)$  we obtain  $S'(t) = h'(t)M(t) > 0$  for  $\tau > 0$ . The results  $S(0) = 0$  and  $S'(t) > 0$  together imply  $S(t) > 0$  for all  $t > 0$ . Differentiating  $S(t)$  with respect to  $p$  yields  $\frac{\partial S(t)}{\partial p} = \frac{\omega(t)}{p^2}$  where  $\omega(t) \equiv 1 - \bar{F}(t) - pH(t)\bar{F}(t) - p^2h(t)\int_0^t H(z)\bar{F}(z)dz$ . Since  $h(0) = H(0) = 0$  and  $\bar{F}(0) = 1$ , we have  $\omega(0) = 0$ . Moreover, using the identities  $H'(t) = h(t)$  and  $\bar{F}'(t) = -ph(t)\bar{F}(t)$  we obtain  $\omega'(t) = -p^2h'(t)\int_0^t H(z)\bar{F}(z)dz < 0$ . The results  $\omega(0) = 0$  and  $\omega'(t) < 0$  together imply  $\omega(t) < 0$  for all  $t > 0$ . Therefore,  $\frac{\partial S(t)}{\partial p} = \frac{\omega(t)}{p^2} < 0$  for  $t > 0$ .  $\square$

**Lemma A2** *Let  $\beta_1 \equiv \frac{kq}{Lp+lq}$  and*

$$Q(\tau) \equiv (\theta(Lp+lq) + kq)S(\tau) - K(Lp+lq)h(\tau) - K. \quad (\text{A2})$$

*Recall  $A(\tau)$ ,  $C(\tau)$ ,  $R(\tau)$  defined in expression (2). The function  $U(\tau) \equiv \theta A(\tau) - C(\tau) - R(\tau)$  is quasiconcave, starting from  $U(0) = -\infty$  and converging to  $U(\infty) = \frac{(\theta\mu - K)p - kq}{(\mu + L)p + lq}$ . Moreover:*

- (a) *If  $\theta + \beta_1 \leq \frac{K}{\mu}$ , then  $U'(\tau) > 0$  for all  $\tau \geq 0$ .*
- (b) *If  $\theta + \beta_1 > \frac{K}{\mu}$ , then  $U(\tau)$  peaks at  $\tau = \hat{\tau}$  where  $\hat{\tau}$  is a unique root of the function  $Q(\tau)$  that satisfies  $Q'(\hat{\tau}) > 0$ .*

**Proof** We first prove the following properties of  $Q(\tau)$  defined in expression (A2): (i) *If  $\theta + \beta_1 \leq \frac{K}{\mu}$ , then  $Q(\tau) < 0$  and  $Q'(\tau) < 0$  for all  $\tau \geq 0$ ; (ii) *If  $\theta + \beta_1 > \frac{K}{\mu}$ , then  $Q(\tau)$  crosses zero exactly once at  $\tau = \hat{\tau} > 0$  that satisfies  $Q(\hat{\tau}) = 0$  and  $Q'(\hat{\tau}) > 0$ .* Using the definition of  $S(\tau)$  in (A1), we can rewrite  $Q(\tau)$  as  $Q(\tau) = \chi(\tau)h(\tau) - (\theta L + (\theta l + k)q/p)F(\tau) - K$  where  $\chi(\tau) \equiv (\theta Lp + (\theta l + k)q)M(\tau) - K(Lp + lq)$ . Using the relation  $\bar{F}'(t) = -ph(t)\bar{F}(t)$ , we obtain  $Q'(\tau) = \chi(\tau)h'(\tau)$ . Since  $h'(\tau) > 0$ , we see that the sign of  $Q'(\tau)$  is equal to the sign of  $\chi(\tau)$ . Observe  $\chi'(\tau) = (\theta Lp + (\theta l + k)q)\bar{F}(\tau) > 0$  with  $\chi(0) = -K(Lp + lq) < 0$  and  $\chi(\infty) = (Lp + lq)\mu\left(\theta + \beta_1 - \frac{K}{\mu}\right)$ , where  $\mu = M(\infty)$ . From the latter expression, we see that  $\chi(\infty) > 0$  iff  $\theta + \beta_1 > \frac{K}{\mu}$ . Suppose  $\theta + \beta_1 \leq \frac{K}{\mu}$ . Then  $\chi(\tau) < 0$  for all  $\tau \geq$*

0 and therefore  $Q(\tau) < 0$  and  $Q'(\tau) < 0$ . Suppose  $\theta + \beta_1 > \frac{K}{\mu}$ . Then  $\chi(\tau)$  crosses zero exactly once from below at  $\tau = \tau^o \equiv M^{-1}\left(\frac{K(Lp+lq)}{\theta Lp+(\theta l+k)q}\right) > 0$ , which implies  $Q'(\tau) < 0$  for  $\tau < \tau^o$  and  $Q'(\tau) > 0$  for  $\tau > \tau^o$ , i.e.,  $Q(\tau)$  is a quasiconvex function with a unique interior minimum occurring at  $\tau = \tau^o$ . Combining this with  $Q(0) = -K < 0$  and  $Q(\infty) = \chi(\infty)h(\infty) - (\theta L + (\theta l + k)q/p) - K = \infty > 0$ , we conclude that  $Q(\tau)$  crosses zero exactly once at  $\tau = \hat{\tau} > \tau^o$  such that  $Q(\hat{\tau}) = 0$  and  $Q'(\hat{\tau}) > 0$ .

Rewriting  $U(\tau) \equiv \theta A(\tau) - C(\tau) - R(\tau)$  using expression (2) yields  $U(\tau) = \frac{\theta M(\tau) - (kq/p)F(\tau) - K}{M(\tau) + (L+lq/p)F(\tau)}$ , where  $M(\tau) = \int_0^\tau \bar{F}(t) dt$ . Taking the limit  $\tau \rightarrow 0$  that results in  $H(0) = F(0) = 0$  and substituting them in  $U(\tau)$ , we find  $U(0) = -\infty$ . Taking the limit  $\tau \rightarrow \infty$  that results in  $H(\infty) = \infty$ ,  $F(\infty) = 1$ , and  $M(\infty) = \mu$ , we find  $U(\infty) = \frac{(\theta\mu - K)p - kq}{(\mu + L)p + lq}$ . Differentiating  $U(\tau)$  using the identity  $\bar{F}'(\tau) = -ph(\tau)\bar{F}(\tau)$  yields  $U'(\tau) = -\frac{\bar{F}(\tau)Q(\tau)}{T(\tau)^2}$ . The statements of the lemma follow from the properties of  $Q(\tau)$  proved above.  $\square$

**Proof (Lemma 1)** The expected length of a vehicle replacement cycle consists of three components: (i) expected vehicle age at the time of replacement; (ii) expected cumulative repair downtimes until replacement; (iii) expected downtime after an unscheduled replacement. With finite retirement age  $\tau < \infty$ , a vehicle is replaced at age  $\min\{Y, \tau\}$ , where  $Y$  denotes vehicle age at the time of first major failure conditional on no vehicle retirement ( $\tau = \infty$ ). Hence, the expected replacement age is equal to  $E[\min\{Y, \tau\}] = \int_0^\tau \bar{F}(t) dt = M(\tau)$ , which also represents the expected vehicle uptime in a single cycle. This is the first component of the expected cycle length. The second component, expected cumulative repair downtimes until replacement, is equal to  $l \times N(\tau)$  where  $l$  is the expected repair lead time and  $N(\tau)$  is the expected number of minor failures until replacement at vehicle age  $\min\{Y, \tau\}$ . The latter is evaluated as  $N(\tau) = \int_0^\tau qh(t) \Pr(Y > t) dt = (q/p)F(\tau)$  (see Beichelt 2006, pp. 138-140). Finally the last component, expected downtime after an unscheduled replacement, is equal to  $L \times \Pr(Y < \tau) = LF(\tau)$  where  $L$  is the expected replacement lead time. Adding up the three components yields the expected cycle length  $T(\tau) = M(\tau) + \left(L + \frac{lq}{p}\right)F(\tau)$ . It then follows that  $A(\tau) = \frac{M(\tau)}{T(\tau)}$ , the expected vehicle uptime in a cycle,  $C(\tau) = \frac{kN(\tau)}{T(\tau)} = \frac{(kq/p)F(\tau)}{T(\tau)}$ , fixed repair cost  $k$  times the expected number of repairs in a cycle, and  $R(\tau) = \frac{K}{T(\tau)}$ , fixed replacement cost  $K$  times the number of replacements in a cycle, which is exactly one because each renewal cycle ends with a replacement.

Differentiating  $A(\tau)$ ,  $C(\tau)$ , and  $R(\tau)$  in expression (2) using the identity  $\bar{F}'(\tau) = -ph(\tau)\bar{F}(\tau)$  yields  $A'(\tau) = -\frac{(Lp+lq)\bar{F}(\tau)S(\tau)}{T(\tau)^2}$ ,  $C'(\tau) = \frac{kq\bar{F}(\tau)S(\tau)}{T(\tau)^2}$ , and  $R'(\tau) = -\frac{K\bar{F}(\tau)[1+(Lp+lq)h(\tau)]}{T(\tau)^2}$ , where  $S(\tau)$  and  $T(\tau)$  are defined in expressions (A1) and (1). Since  $S(\tau) > 0$  (see Lemma A1), it follows that  $A'(\tau) < 0$ ,  $C'(\tau) > 0$ , and  $R'(\tau) < 0$ . It is straightforward to evaluate the limiting values at  $\tau = 0$  and  $\tau \rightarrow \infty$ .  $\square$

**Proof (Lemma 2)** It is straightforward to verify that this is a special case of Lemma A2(b) with  $\theta = 0$ . Therefore, the cost-minimizing  $\tau^0 = \hat{\tau}$ , as given in Lemma A2(b).  $\square$

**Proof (Proposition 1)** It is straightforward to verify that this is a special case of Lemma A2(b) with  $\theta = \frac{\gamma v}{1-\gamma}$ . It is also straightforward to verify that the unconstrained optimal solution  $\tau^*(\gamma) = \hat{\tau}$  is decreasing in  $\gamma$ . Therefore, there must exist a threshold  $0 < \bar{\gamma} \leq 1$ , such that  $\tau^*(\gamma) > \underline{\tau}$  if and only if  $0 \leq \gamma < \bar{\gamma}$ . Hence, the results of (a) and (b) hold. Moreover, in case (a), we have  $\underline{\tau} < \tau^*(\gamma) < \bar{\tau}$ , implying that SE earns positive profit and achieves less than maximum availability. Also note that when  $\gamma = 0$ , this case reduces to that of Lemma 2, which means the SE earns maximum profit. In case (b), we have  $\tau^*(\gamma) = \underline{\tau} < \bar{\tau}$ , implying that SE earns zero profit and achieves maximum availability.  $\square$

**Proof (Proposition 2)** To achieve the first-best performance under the decentralized decision setting, it is necessary to induce the government to choose  $\tau_G^* = \tau^*(\gamma)$ . This can be achieved by the following nonlinear payment scheme:

$$P^*(\tau_G) = \begin{cases} r^* A(\tau_G) & \text{if } \tau_G \leq \tau^*(\gamma), \\ \infty & \text{otherwise,} \end{cases}$$

where  $r^* = \frac{b_0 - R(\tau^*(\gamma))}{A(\tau^*(\gamma))}$ . Under the above payment scheme, the government's cost function is given by

$$\left( \frac{b_0 - R(\tau^*(\gamma))}{A(\tau^*(\gamma))} \right) A(\tau_G) + R(\tau_G).$$

From Lemma 1, we know  $A(\tau)$  and  $R(\tau)$  are both decreasing in  $\tau$ . Therefore, the government is induced to set  $\tau_G$  at the maximum possible value  $\tau^*(\gamma)$  to minimize total cost. Moreover, it can be verified that the total cost is  $b_0$  at  $\tau_G = \tau^*(\gamma)$ , which meets the budget constraint. Thus, the cost-minimizing  $\tau_G = \tau^*(\gamma)$  is feasible. This completes the proof.  $\square$

**Proof (Proposition 3)** Under the linear ROC contract, the government's cost function is  $rA(\tau) + R(\tau)$ . From Lemma 1, we know  $A(\tau)$  and  $R(\tau)$  are both decreasing in  $\tau$ . Therefore, the government sets  $\tau_G$  at the maximum possible value  $\bar{\tau}$  to minimize cost. It follows that  $\tau_G^\dagger = \bar{\tau} > \tau^*(\gamma)$ . Given the government's optimal decision, SE will set  $r$  at the maximum possible value of  $\frac{b_0 - R(\bar{\tau})}{A(\bar{\tau})}$ , where the government budget constraint is binding. Because  $\bar{\tau} > \tau^*(\gamma)$  and  $A(\tau)$  and  $R(\tau)$  are both decreasing in  $\tau$ , it follows that  $r^\dagger = \frac{b_0 - R(\bar{\tau})}{A(\bar{\tau})} > \frac{b_0 - R(\tau^*(\gamma))}{A(\tau^*(\gamma))} = r^*$ . Finally, SE's equilibrium profit is given by  $b_0 - C(\bar{\tau}) - R(\bar{\tau}) > 0$  for any  $0 \leq \gamma \leq 1$ .  $\square$

**Proof (Proposition 4)** Under the linear RRC contract, it is straightforward to verify the problem is equivalent to the first-best case, except for the reduced budget constraint  $b_0 - \psi$ . Thus, by Proposition 1, it follows that  $\tau^\dagger(\gamma, \psi)$  is decreasing in  $\gamma$  and increasing in  $\psi$ . Therefore, there must exist a threshold  $0 < \gamma_1(\psi) \leq 1$ , such that  $\tau^\dagger(\gamma, \psi)$  is an interior solution if and only if  $0 \leq \gamma < \gamma_1(\psi)$ . Hence, in case (a), we have  $\tau^\dagger(\gamma, \psi) = \tau^*(\gamma) < \tau_G^\dagger$ , and in case (b), we have  $\tau^*(\gamma) < \tau^\dagger(\gamma, \psi) < \tau_G^\dagger$ . From Lemma 1, we know  $A(\tau)$  is decreasing in  $\tau$ , it follows that  $r^\dagger = \frac{b_0}{A(\tau^\dagger(\gamma, \psi))} > r^\dagger > r^*$ . Finally, observe that under linear ROC, SE's equilibrium utility is given by  $\gamma v A(\bar{\tau}) + (1 - \gamma)(b_0 - C(\bar{\tau}) - R(\bar{\tau}))$ , and under linear RRC, SE's equilibrium utility is given by  $\gamma v A(\tau^\dagger) + (1 - \gamma)(b_0 - \psi - C(\tau^\dagger) - R(\tau^\dagger))$ . By comparing the above utility functions and also using the fact that  $\tau^\dagger$  is decreasing in  $\gamma$ , it follows that there exists an increasing threshold  $\gamma_2(\psi)$  in  $\psi$ , such that, SE prefers the linear RRC over linear ROC if and only if  $\gamma \geq \gamma_2(\psi)$ .  $\square$

**Proof (Lemma 3)** For notational convenience suppress the arguments  $(x, y)$ . The results in part (b) are straightforward, obtained by inspecting the expression (2) with the substitution  $l = l(y)$ . Consider part (a). Let  $\ell \equiv L + l \frac{1-\phi}{\phi} > 0$  and  $m(\tau) \equiv \frac{M(\tau)}{F(\tau)}$ . With  $\bar{F}(t) = \exp(-pH(t)) = \exp(-\phi\lambda(x)H(t))$  and  $M(\tau) = \int_0^\tau \bar{F}(t) dt$ , we have  $\frac{\partial F(\tau)}{\partial x} = \phi\lambda'(x)H(\tau)\bar{F}(\tau) < 0$  and  $\frac{\partial M(\tau)}{\partial x} = -\phi\lambda'(x) \int_0^\tau H(t)\bar{F}(t) dt > 0$ . Then  $\frac{\partial m(\tau)}{\partial x} = \frac{\partial}{\partial x} \frac{M(\tau)}{F(\tau)} = -\phi\lambda'(x) \frac{\int_0^\tau H(t)\bar{F}(t) dt + H(\tau)\bar{F}(\tau)m(\tau)}{F(\tau)} > 0$ . Substituting  $p = \phi\lambda(x)$  and  $q = (1 - \phi)\lambda(x)$  into expressions (2) and (1) yields  $T(\tau) = M(\tau) + \ell F(\tau)$ ,  $A(\tau) = \left(1 + \frac{\ell}{m(\tau)}\right)^{-1}$ , and  $C(\tau) = \frac{1-\phi}{\phi} \frac{k}{\ell + m(\tau)}$ . From these expressions we find  $\frac{\partial A(\tau)}{\partial x} = \frac{\partial A(\tau)}{\partial m(\tau)} \frac{\partial m(\tau)}{\partial x} > 0$  and  $\frac{\partial C(\tau)}{\partial x} = \frac{\partial C(\tau)}{\partial m(\tau)} \frac{\partial m(\tau)}{\partial x} < 0$ . Finally,  $\frac{\partial T(\tau)}{\partial x} = \phi\lambda'(x) \left[-\int_0^\tau H(t)\bar{F}(t) dt + \ell H(\tau)\bar{F}(\tau)\right]$  together with  $R(\tau) = \frac{K}{T(\tau)}$  imply  $\frac{\partial R(\tau)}{\partial x} < 0$  if and only if  $\ell < \frac{\int_0^\tau H(t)\bar{F}(t) dt}{H(\tau)\bar{F}(\tau)}$ . To prove the last result in part (a), note  $C(\tau) + R(\tau) \rightarrow \frac{kqH(\tau) + K}{\tau + lqH(\tau)}$  in the limit  $\phi \rightarrow 0$  which leads to  $p = 0$  and  $q = \lambda(x)$ . Since  $\frac{\partial}{\partial q} [C(\tau) + R(\tau)] = \frac{(k\tau - Kl)H(\tau)}{[\tau + lqH(\tau)]^2}$ , we have  $\frac{\partial}{\partial x} [C(\tau) + R(\tau)] = \lambda'(x) \frac{\partial}{\partial q} [C(\tau) + R(\tau)] < 0$  if and only if  $\frac{\tau}{l} > \frac{K}{k}$ .  $\square$

**Proof (Proposition 5)** For notational convenience suppress the arguments  $(x, y)$ . Consider linear ROC. According to Proposition 3, the government sets  $\tau^\dagger = \bar{\tau}$  in equilibrium where  $\bar{\tau}$  is determined at the binding availability constraint  $A(\tau) = a_0$ . Since  $A'(\tau) < 0$  and  $\frac{\partial}{\partial y} A(\tau) > 0$  everywhere (Lemma 3), it follows that  $\frac{\partial \bar{\tau}}{\partial y} > 0$ . Now consider linear RRC. It follows from Proposition 4 that if  $\gamma = 1$ , SE sets  $\tau^\dagger = \underline{\tau}$  where  $\underline{\tau} = \min\{\tau : C(\tau) + R(\tau) = b_0 - \psi - g(x, y)\}$ . Since  $C(\tau) + R(\tau)$  is quasiconvex (Proposition 1),  $\underline{\tau}$  is determined at a point where  $C'(\tau) + R'(\tau) < 0$ . This, combined with the result  $\frac{\partial}{\partial y} [C(x, y, \tau) + R(x, y, \tau)] > 0$  from Lemma 3 and the assumption  $\frac{\partial}{\partial y} g(x, y) > 0$  implies  $\frac{\partial \underline{\tau}}{\partial y} > 0$  such that the constraint  $C(\underline{\tau}) + R(\underline{\tau}) = b_0 - \psi - g(x, y)$  remains binding. If  $\gamma = 0$ , on the other hand,  $\tau^\dagger$  is determined at the interior point  $\hat{\tau}$  that minimizes  $C(\tau) + R(\tau)$ . The result

---

$\frac{\partial \bar{\tau}}{\partial y} < 0$  is obtained by implicitly differentiating the first-order condition of  $C(\tau) + R(\tau)$ .  $\square$

**Proof (Proposition 6)** Recall from Proposition 3 that the equilibrium  $\tau$  is set at  $\bar{\tau}$  where the availability constraint binds, i.e.,  $A(\bar{\tau}) = a_0$  and that the payment rate  $r$  is set at the value where the budget constraint  $rA(\bar{\tau}) + R(\bar{\tau}) \leq b_0$  is binding at the equilibrium. These remain true even with the addition of efforts  $x$  and  $y$  and effort cost  $g(x, y)$ . As a result, SE's objective function in the problem  $(\mathcal{P}'_1)$  in §4.2, with the addition of effort cost  $g(x, y)$  and  $\bar{\tau}$  expressed as a function of  $x$  and  $y$ , is equivalent to  $\gamma v a_0 + (1 - \gamma) [b_0 - C(x, y, \bar{\tau}(x, y)) - R(x, y, \bar{\tau}(x, y)) - g(x, y)]$  It is clear from this expression that the optimal values of  $x^*$  and  $y^*$  are independent of  $\gamma$ .  $\square$
